# Supplementary material for: Miscounting microplastics as a result of matrix molecules: optimizing identification and quantification of microplastics in natural freshwater systems
Source: Royal Society of Chemistry journal article supplement (doi:10.1039/d5em00458f), 2025-01-01
Supplement: d5em00458f1.pdf [file d5em00458f1.pdf]

Supporting Information: Miscounting microplastics as a result of matrix molecules: Optimizing  
identification and quantification of microplastics in natural freshwater systems

**Authors and Affiliations**

Joseph Marchand<sup>a</sup> ; ORCID ID 0009-0000-3607-5790

Ariyah Thomas<sup>a</sup>; ORCID ID 0009-0007-8568-7399

Elizabeth C. Minor<sup>a,b\*</sup> ; ORCID ID 0000-0001-6930-9338

Amber Ruthenbeck<sup>a</sup> ; ORCID ID 0009-0005-7891-4624

Alexa Nielsen<sup>a</sup>

Melissa A. Maurer-Jones<sup>a</sup> ; ORCID ID 0000-0003-1517-6183

<sup>a</sup> Department of Chemistry and Biochemistry, University of Minnesota Duluth, 1038 University Dr, Duluth, Minnesota 55812,  
United States

<sup>b</sup> Large Lakes Observatory, University of Minnesota Duluth, 2205 East 5<sup>th</sup> St, Duluth, MN 55812. E-mail: [eminor@d.umn.edu](mailto:eminor@d.umn.edu)

\* Corresponding author

**Table S1.** Sample name, and coordinates of surface water matrices.

| <b>Sample #</b> | <b>Latitude (DMS)</b> | <b>Longitude (DMS)</b> | <b>Name</b>                     |
|-----------------|-----------------------|------------------------|---------------------------------|
| <i>1</i>        | -94°47'37" W          | 48°54'23" N            | Lake of the Woods<br>Transect 1 |
| <i>2</i>        | -92°49'53" W          | 45°22'50" N            | South Center Lake               |
| <i>3</i>        | -96°21'19" W          | 44°24'26" N            | Shaokatan                       |

**Table S2.** When to use method quick guide to help identify when to use each method. Full description of the method and each step can be found in section 2.

| <b>Method</b> | <b>Method 1</b>     | <b>Method 2</b>     | <b>Method 3</b>     | <b>Method 4</b>     |
|---------------|---------------------|---------------------|---------------------|---------------------|
| <i>Step 1</i> | Filter onto Anodisc | Dry down            | Dry Down            | Dry Down            |
| <i>Step 2</i> | FTIR Analysis       | Fenton Oxidation    | Fenton Oxidation    | Fenton Oxidation    |
| <i>Step 3</i> | -                   | 5M NaCl             | 5M NaCl             | Ethanol             |
| <i>Step 4</i> | -                   | Filter onto Anodisc | 50 um Filter        | 50 um Filter        |
| <i>Step 5</i> | -                   | FTIR Analysis       | Sonicate, and rinse | Sonicate, and rinse |
| <i>Step 6</i> | -                   | -                   | Filter onto Anodisc | 5M NaCl             |
| <i>Step 7</i> | -                   | -                   | FTIR Analysis       | Filter onto Anodisc |
| <i>Step 8</i> | -                   | -                   | -                   | FTIR Analysis       |

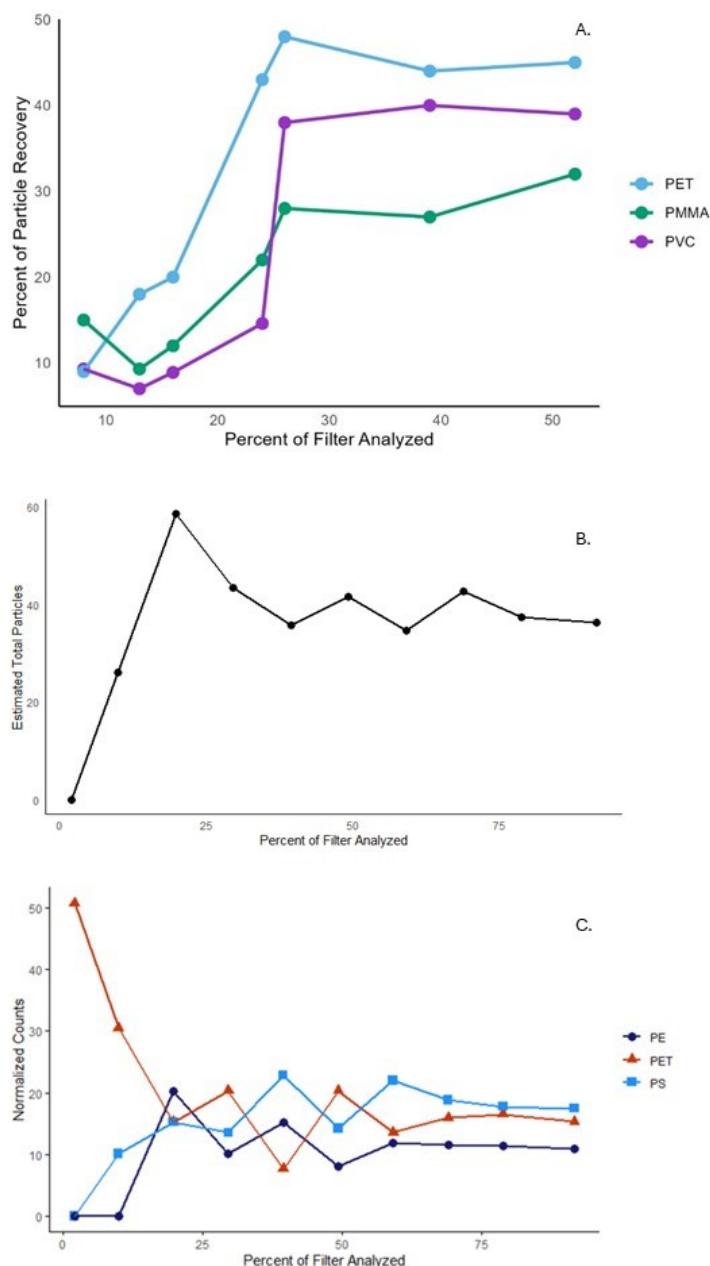

**Figure S1.** Evaluation of plastic standards to determine ideal percentage of Anodisc to analyze via  $\mu$ FTIR. A). In-house developed microplastic standards, PET, PMMA, and PVC were analyzed by scanning various percentages of the filter and extrapolating to determine recovery percentages. Recoveries increased until about 30% and then plateaued. B and C). A MicroPrefs Tablet (PE, PET, PS, 50-300  $\mu$ m, from Chiron Microplastics) was dissolved in MilliQ water, filtered onto an Anodisc and scanned over 91.6% of the filter area. Random fields of view summing to different proportions of the filter were counted to determine how much of a filter needed to be scanned for consistent results. Total counts are shown in B and the individual polymer counts in C. Based upon the data in A, B, and C, approximately 30% of the filter appears to be a reasonable compromise between scanning time and estimation of microplastic total counts and composition.

**Table S3.** Drinking water facility sample concentrations and respective total particles and volume.

| Sample                                          | Number of Microplastics (With 3.1 area multiplier) | Volume (Liters) | Microplastics per Liter (MPL) |
|-------------------------------------------------|----------------------------------------------------|-----------------|-------------------------------|
| DWS Raw 100 $\mu\text{m}$ – Before Resuspension | 6.2 ( $n = 2$ )                                    | 776.596         | 0.008                         |
| DWS Raw 100 $\mu\text{m}$ – After Resuspension  | 18.6 ( $n = 6$ )                                   | 776.596         | 0.024                         |
| DWS Finished 100 $\mu\text{m}$                  | 68.2 ( $n = 22$ )                                  | 996.21          | 0.068                         |

**Table S4.** Drinking water facility samples individual particle descriptions of composition, length and width in microns, visual morphology, and visual color.

| Sample ID                                       | Number | Composition | Length ( $\mu\text{m}$ ) | Width ( $\mu\text{m}$ ) | Morphology | Color       |
|-------------------------------------------------|--------|-------------|--------------------------|-------------------------|------------|-------------|
| DWS Raw 100 $\mu\text{m}$ – Before Resuspension | 1      | PP          | 51.97                    | 29.11                   | Unknown    | Unknown     |
|                                                 | 2      | PP          | 262.6                    | 58.17                   | Fragment   | Unknown     |
| DWS Raw 100 $\mu\text{m}$ – After Resuspension  | 1      | PET         | 261.87                   | 28.5                    | Fiber      | Translucent |
|                                                 | 2      | PU          | 196.97                   | 132.72                  | Fragment   | Gray        |
|                                                 | 3      | PU          | 124.53                   | 79.05                   | Fragment   | Gray        |
|                                                 | 4      | PET         | 475.63                   | 66.44                   | Fiber      | Translucent |
|                                                 | 5      | PET         | 734.67                   | 511.2                   | Fragment   | Translucent |
|                                                 | 6      | PA          | 193.67                   | 81.84                   | Fragment   | Translucent |
| DWS Finished 100 $\mu\text{m}$                  | 1      | PE          | 64.6                     | 43                      | Fragment   | Translucent |
|                                                 | 2      | PA          | 140.5                    | 119.5                   | Fragment   | Translucent |
|                                                 | 3      | PA          | 62                       | 50.5                    | Fragment   | Translucent |
|                                                 | 4      | PMMA        | 326.8                    | 219.7                   | Fragment   | Translucent |
|                                                 | 5      | PE          | 93.5                     | 48.5                    | Fragment   | Translucent |
|                                                 | 6      | PA          | 68.4                     | 50.6                    | Fragment   | Translucent |
|                                                 | 7      | PE          | 72                       | 56.1                    | Fragment   | Translucent |
|                                                 | 8      | PA          | 98.2                     | 42.4                    | Fragment   | Translucent |
|                                                 | 9      | PMMA        | 134                      | 112.9                   | Fragment   | Brown       |
|                                                 | 10     | PA          | 90.1                     | 70                      | Fragment   | Brown       |
|                                                 | 11     | PA          | 80.3                     | 57.5                    | Fragment   | Brown       |
|                                                 | 12     | PA          | 89.6                     | 51.3                    | Fragment   | Translucent |
|                                                 | 13     | PP          | 80.9                     | 45.4                    | Fragment   | Translucent |
|                                                 | 14     | PP          | 139.9                    | 132.2                   | Fragment   | Translucent |
|                                                 | 15     | POM         | 212.5                    | 72.8                    | Fragment   | Translucent |
|                                                 | 16     | PU          | 289.4                    | 175.8                   | Fragment   | Brown       |
|                                                 | 17     | PU          | 1112.2                   | 718.3                   | Fragment   | Brown       |

|  |    |     |        |      |          |             |
|--|----|-----|--------|------|----------|-------------|
|  | 18 | PP  | 441.6  | 58.8 | Fragment | Brown       |
|  | 19 | PP  | 324.3  | 91.8 | Fragment | Brown       |
|  | 20 | PP  | 169.4  | 45.2 | Fragment | Translucent |
|  | 21 | PET | 690    | 31.7 | Fiber    | Translucent |
|  | 22 | PET | 1926.3 | 64.8 | Fiber    | Translucent |

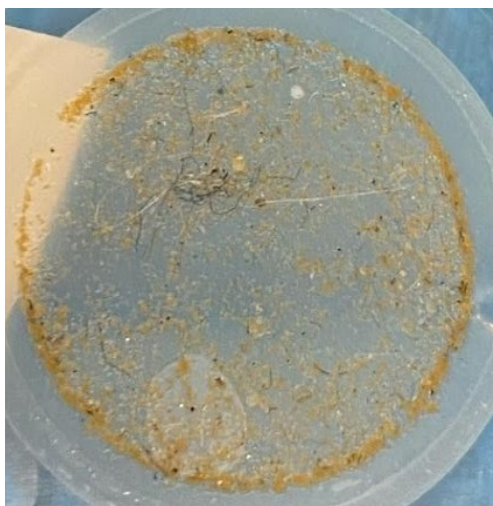

**Figure S2.** Sample 2, after a 1:1 addition of denatured ethanol to the sample volume (Method 4), was filtered onto an Anodisc analysis filter.

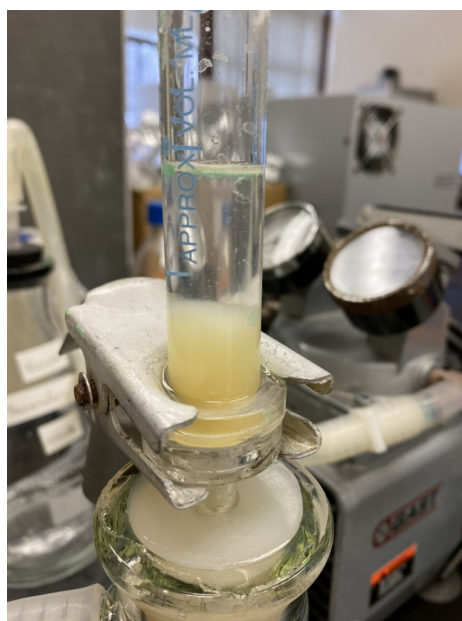

**Figure S3.** Filtration apparatus following the addition of 5M NaCl to the Fenton/Alcojet solution. The introduction of salt induced the formation of a soap-like precipitate, leading to the sample clogging the filtration apparatus.

**Table S5.** Particle size information for positive control standards processed by Method 1 vs Method 4. 25 random particles from Method 1 vs Method 4 were sized using the visual microscopy sizing tool in the Bruker LUMOS II software.

| <b>Method 1</b>        |                    |                   | <b>Method 4</b>        |                    |                   |
|------------------------|--------------------|-------------------|------------------------|--------------------|-------------------|
| <i>Particle Number</i> | <i>Length (um)</i> | <i>Width (um)</i> | <i>Particle Number</i> | <i>Length (um)</i> | <i>Width (um)</i> |
| 1                      | 883                | 773               | 1                      | 1075               | 489               |
| 2                      | 1041               | 697               | 2                      | 1146               | 848               |
| 3                      | 1021               | 710               | 3                      | 1309               | 800               |
| 4                      | 867                | 547               | 4                      | 1417               | 1183              |
| 5                      | 992                | 702               | 5                      | 2248               | 1199              |
| 6                      | 1076               | 719               | 6                      | 851                | 749               |
| 7                      | 1216               | 959               | 7                      | 1619               | 600               |
| 8                      | 1235               | 639               | 8                      | 1042               | 647               |
| 9                      | 1421               | 1051              | 9                      | 1455               | 1109              |
| 10                     | 1289               | 938               | 10                     | 764                | 581               |
| 11                     | 1107               | 803               | 11                     | 1503               | 885               |
| 12                     | 1048               | 658               | 12                     | 1882               | 1107              |
| 13                     | 791                | 609               | 13                     | 1147               | 776               |
| 14                     | 1471               | 858               | 14                     | 1249               | 466               |
| 15                     | 959                | 681               | 15                     | 1779               | 946               |
| 16                     | 866                | 764               | 16                     | 1630               | 1384              |
| 17                     | 852                | 741               | 17                     | 1706               | 1029              |
| 18                     | 1072               | 727               | 18                     | 1137               | 738               |
| 19                     | 1156               | 789               | 19                     | 2070               | 1244              |
| 20                     | 976                | 607               | 20                     | 1122               | 872               |
| 21                     | 1108               | 615               | 21                     | 1057               | 805               |
| 22                     | 939                | 520               | 22                     | 1254               | 567               |
| 23                     | 791                | 571               | 23                     | 690                | 728               |
| 24                     | 872                | 603               | 24                     | 1859               | 1142              |
| 25                     | 918                | 542               | 25                     | 1236               | 778               |
| <b>Average</b>         | <b>1039</b>        | <b>713</b>        | <b>Average</b>         | <b>1370</b>        | <b>867</b>        |
| <b>Median</b>          | <b>1021</b>        | <b>702</b>        | <b>Median</b>          | <b>1254</b>        | <b>805</b>        |
| <b>St dev</b>          | <b>182</b>         | <b>135</b>        | <b>St dev</b>          | <b>401</b>         | <b>251</b>        |
| <b>Quartile 1</b>      | <b>883</b>         | <b>609</b>        | <b>Quartile 1</b>      | <b>1122</b>        | <b>728</b>        |
| <b>Quartile 3</b>      | <b>1108</b>        | <b>773</b>        | <b>Quartile 3</b>      | <b>1630</b>        | <b>1107</b>       |

**Table S6.** Comparison of the hotel-restaurant complex finished drinking water sample as initially processed via Method 1 and after resuspension from the Anodisc filter and reprocessing via Method 4.

| <i>Raw counts</i>                          | <i>Method 1</i> | <i>Method 4</i> |
|--------------------------------------------|-----------------|-----------------|
| <i>PP</i>                                  | 21              | 9               |
| <i>PET</i>                                 | 11              | 3               |
| <i>PA</i>                                  | 12              | 2               |
| <i>Average length (<math>\mu m</math>)</i> | 202             | 256             |

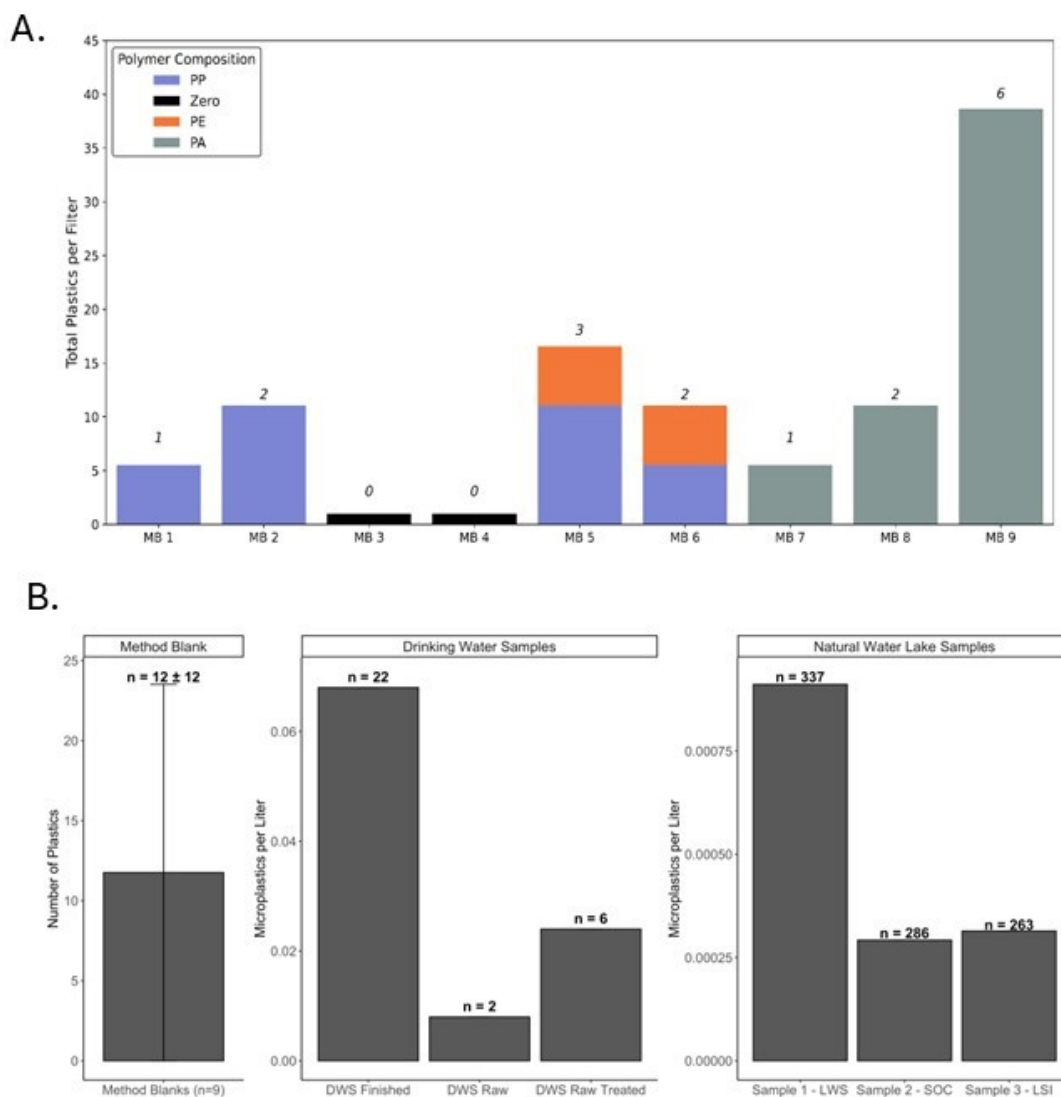

**Figure S4.** Overview of plastics counts in the methods blanks vs actual samples discussed in the manuscript. A. Data and polymer composition for each of the nine methods blanks performed during this project; 17% of a filter is scanned for each of these. B. Average method blank vs sample counts and concentrations for samples described in the manuscript. Note that DWS Raw are the counts before removal of clay while DWS Raw Treated is after the clay removal step (see manuscript, Fig. 1). The numbers above the bars are the raw counts from the portion of the filter scanned, with the blank counts (from 17% of the filter as shown in A) adjusted to match the sample filter percentage of ~32%. Thus, if blank correction were performed, 12 particles would need to be subtracted from each sample before conversion to the microplastics per liter value.



A)

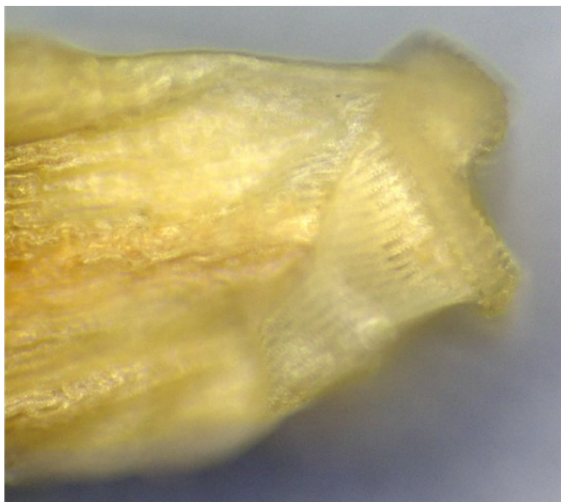

B)

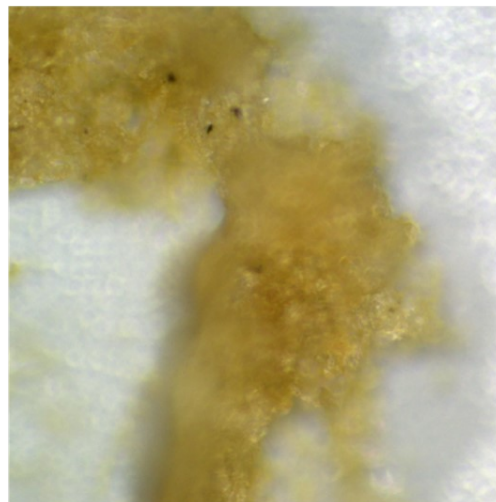

**Figure S5** Microscopic images of the wax end of a spruce needle (A) and the residue removed post-Fenton oxidation (B), both analyzed in this study.

**Table S7.** Specific identification peaks and corresponding normalized intensities for EVAc standards and two leaf waxes. Intensities are normalized to the highest intensity peak in each spectrum.

| EVAc Standard                  |                      | Spruce Needle Wax              |                      | Basswood Leaf Wax              |                      |
|--------------------------------|----------------------|--------------------------------|----------------------|--------------------------------|----------------------|
| Wavenumber (cm <sup>-1</sup> ) | Normalized Intensity | Wavenumber (cm <sup>-1</sup> ) | Normalized Intensity | Wavenumber (cm <sup>-1</sup> ) | Normalized Intensity |
| 1464                           | 0.232                | 1464                           | 0.375                | 1463                           | 0.216                |
| 1738                           | 0.515                | 1732                           | 1.000                | 1734                           | 0.790                |
| 2851                           | 0.674                | 2851                           | 0.764                | 2852                           | 0.611                |
| 2922                           | 1.000                | 2925                           | 0.968                | 2927                           | 1.000                |

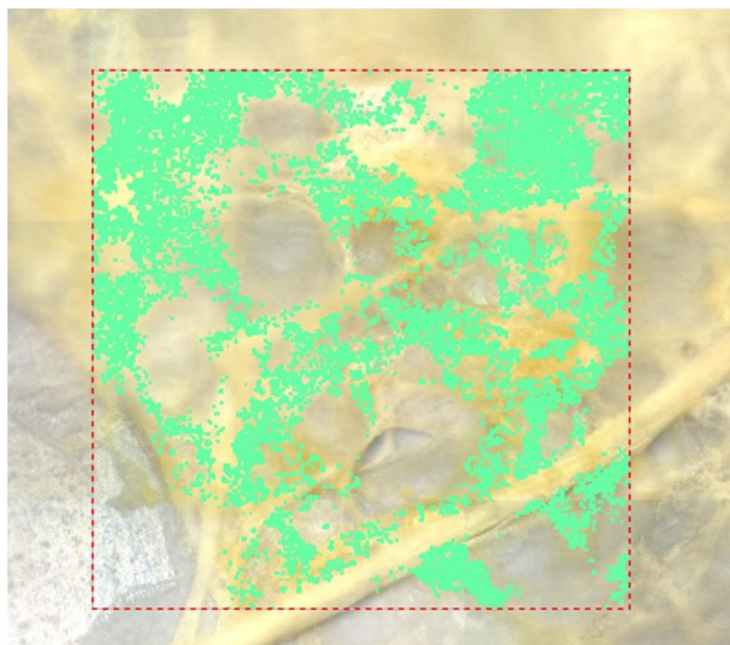

**Figure S6** Purity Microplastic Finder (PMF) polymer identification map of Fenton-oxidized basswood leaf wax. The majority of the scanned area is identified as ethylene-vinyl acetate copolymer (EVAc), represented by light green pixels.

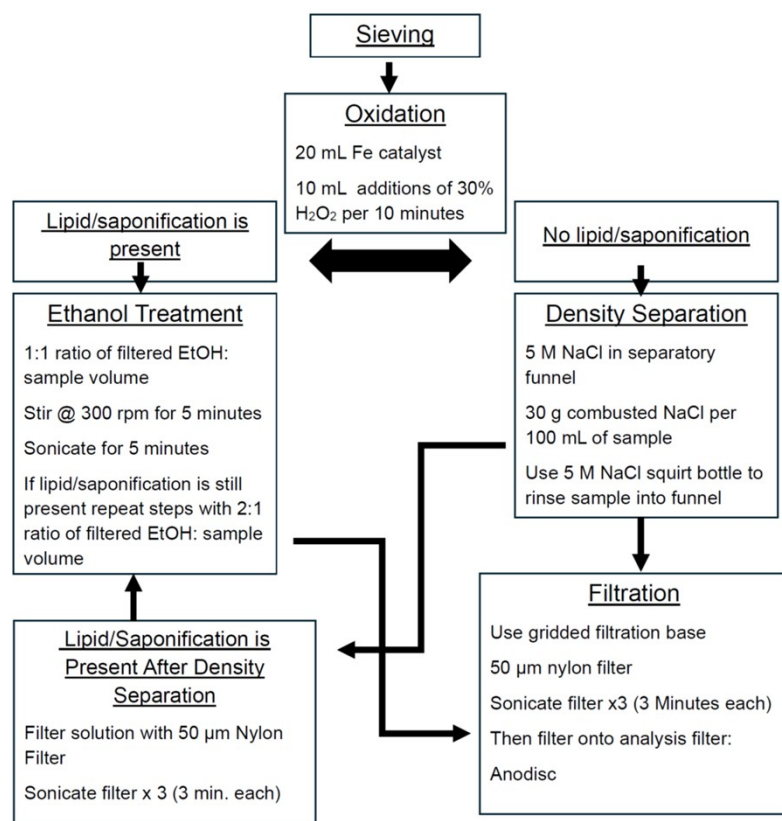

**Figure S7** Flowchart of the newly proposed method for in-lab use.
